# Supplementary material for: miR-27b-3p a Negative Regulator of DSB-DNA Repair
Source: MDPI journal article supplement (doi:10.3390/genes12091333), 2021-08-27
Supplement: s1 [file s1]

**Table S1. Cell survival after several genotoxic agents**

| Treatment         | Non-transfected |      | miR-27b-3p mimic |      | anti-miR-27b-3p |      |
|-------------------|-----------------|------|------------------|------|-----------------|------|
|                   | Mean            | SD   | Mean             | SD   | Mean            | SD   |
| Control           | 82.4            | 6.58 | 82.2             | 7.56 | 81              | 5.61 |
| UV                | 75              | 3.67 | 76.8             | 3.11 | 77.4            | 4.51 |
| FeCl <sub>3</sub> | 88              | 4.85 | 83.4             | 4.34 | 83.6            | 6.47 |
| IR                | 77.4            | 5.81 | 79.2             | 2.17 | 78.6            | 7.02 |
| DOX               | 78              | 5.24 | 77.2             | 4.87 | 79.8            | 3.27 |

Data represents the mean percentages and standard deviations (SD) of five independent measurements. According to Student's t- test, no statistical differences were found between control and each genotoxic agents in non-transfected cells and under miR-27b-3p mimic or anti-miR-27b-3p conditions.
